# Supplementary material for: Ancient ubiquitous protein-1 mediates sterol-induced ubiquitination of 3-hydroxy-3-methylglutaryl CoA reductase in lipid droplet–associated endoplasmic reticulum membranes
Source: PubMed Central journal article supplement — Mol Biol Cell. 2013 Feb 1;24(3):169–83. doi: 10.1091/mbc.E12-07-0564 (PMC3564538; doi:10.1091/mbc.e12-07-0564), 2013-02-01
Supplement: supp_E12-07-0564v1_CombinedSupMats.pdf [file supp_E12-07-0564v1_CombinedSupMats.pdf]

**A**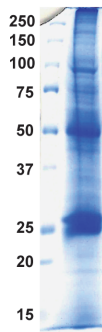**B**

| Partial list of gp78-associated proteins | Sequence coverage (%) |
|------------------------------------------|-----------------------|
| gp78                                     | 23.8                  |
| Aup1                                     | 4.4                   |
| Bat3                                     | 35.3                  |
| Bip                                      | 7.5                   |
| Cue-domain containing protein 1-like     | 4.0                   |
| p97/VCP                                  | 7.3                   |
| HMG CoA reductase                        | 9.8                   |
| Protein disulfide isomerase              | 3.1                   |
| Proteasome (S4) regulatory subunit       | 3.6                   |
| Proteasome subunit p42                   | 3.9                   |
| Proteasome subunit alpha type-2          | 6.0                   |
| Proteasome subunit beta type-1           | 7.5                   |
| proteasome subunit beta type -3          | 6.8                   |
| Rab1b                                    | 8.0                   |
| Rab5b                                    | 5.6                   |
| Rab5c                                    | 6.9                   |
| Rab7                                     | 6.3                   |
| Rab14                                    | 14.0                  |
| Rab-33b                                  | 14.0                  |
| Rab39                                    | 3.0                   |
| Rab6 interacting protein                 | 1.2                   |
| Sec11-like 1                             | 4.2                   |
| Sec22-like 1                             | 6.5                   |
| SEL1L                                    | 5.0                   |
| SPFH2                                    | 9.7                   |
| Ufd2 (Ube4A)                             | 1.3                   |
| Ubiquitin                                | 17.1                  |
| Ubiquilin 4                              | 2.7                   |
| Ubx d8                                   | 4.0                   |
| Ubx d2                                   | 3.1                   |
| USP19                                    | 11.5                  |

**Supplementary Figure 1. Identification of gp78 - associated proteins through tandem affinity purification.** (A) CHO/gp78-TAP cells were set up on day 0 at  $7 \times 10^5$  cells/100-mm dish in medium A containing 5% LPDS. On day 2, the cells were depleted of sterols through incubation in medium A supplemented with 5% LPDS, 10  $\mu$ M compactin and 50  $\mu$ M mevalonate. After 16 h at 37 °C, the cells were pretreated for 2 h with 10  $\mu$ M MG-132, after which they received 1  $\mu$ g/ml of 25-hydroxycholesterol, 10  $\mu$ g/ml cholesterol and 10 mM mevalonate and were incubated an additional 2 h at 37 °C. The cells were subsequently harvested, lysed, and subjected to affinity chromatography on human IgG-conjugated beads. Co-precipitated proteins were released from the beads by incubation with the TEV protease and the eluted material was precipitated with acetone, and resuspended proteins were fractionated by 4-20% gradient SDS-PAGE, followed by staining with colloidal blue. Visible bands were excised from the gel, digested with trypsin, and protein identities were determined by tandem mass spectrometry. Sequence coverage for identified proteins is summarized in the table (B).

## Ubc7 Immunoprecipitation

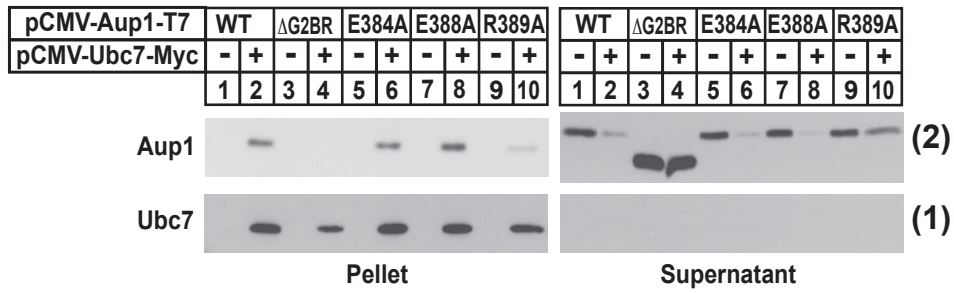

**Supplementary Figure 2.** Association of Ubc7 with various mutants of Aup1. CHO-7 cells were set up for experiments on day 0, transfected on day 1 with 1.0  $\mu\text{g}/\text{dish}$  pCMV-Ubc7-Myc together with 0.1  $\mu\text{g}/\text{dish}$  wild type or mutant pCMV-Aup1-T7, and depleted of sterols as described in the legend to Figure 1C. After 16 h at 37 °C, cells were refed medium A containing 5% LPDS, 10  $\mu\text{M}$  compactin, and 10  $\mu\text{M}$  MG-132. After 2 h at 37 °C, the cells were subsequently harvested, lysed, and immunoprecipitated with anti-Myc. Resulting pellet and supernatant fractions were subjected to immunoblot analysis with anti-T7 IgG (against Aup1) and IgG-9E10 (against Ubc7).

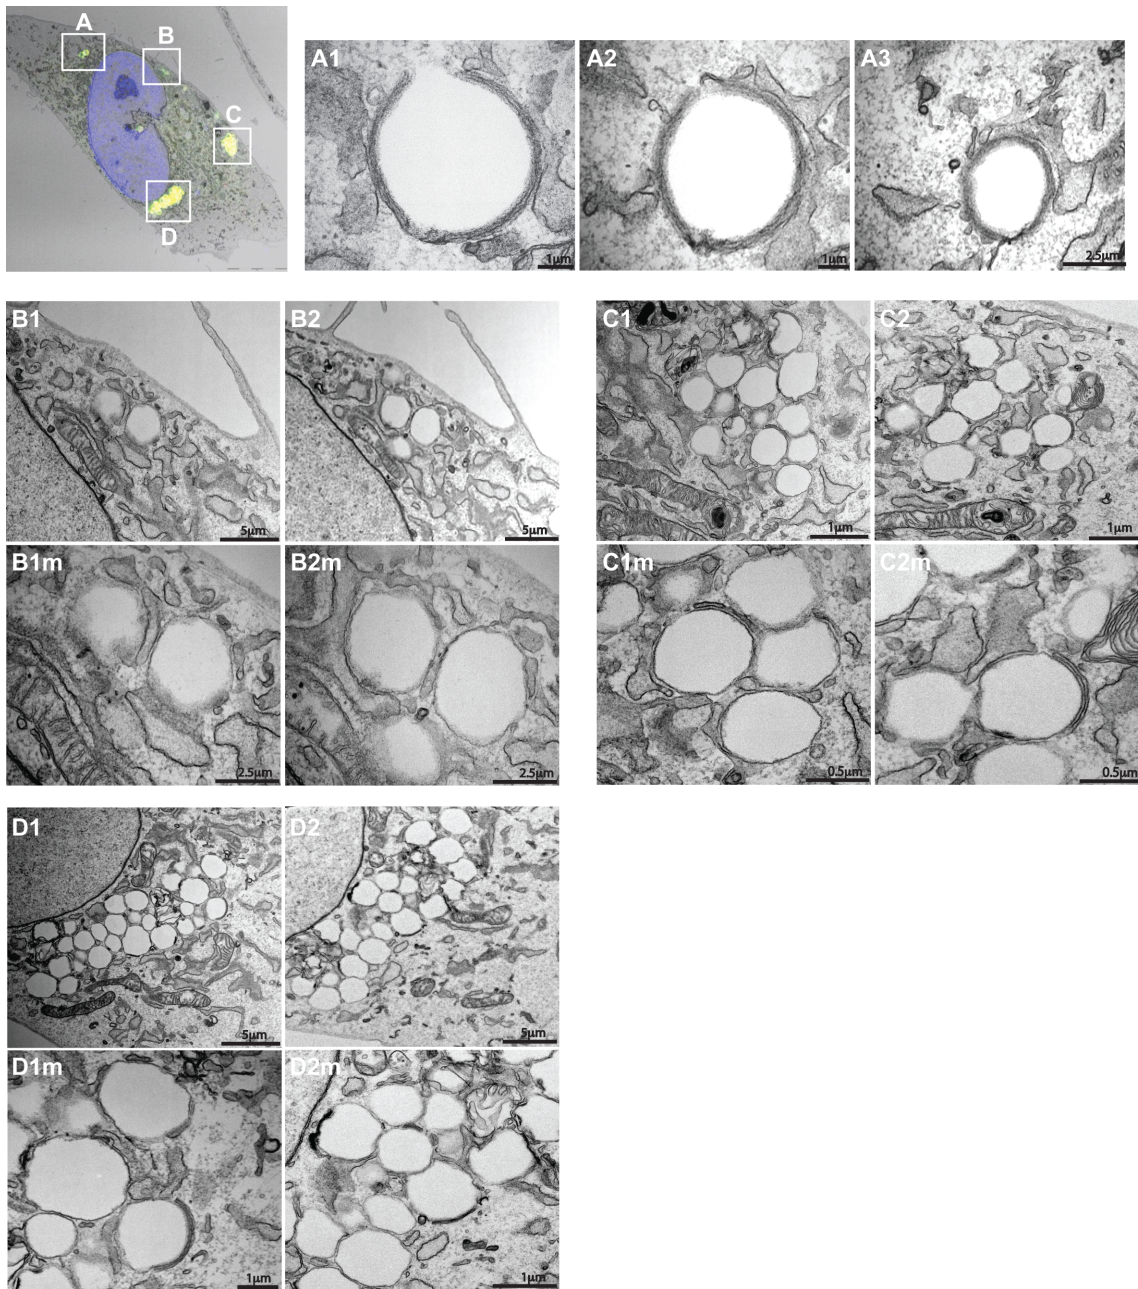

**Supplementary Figure 3.** Close association of ER membrane and lipid droplets as revealed by transmission electron microscopy (TEM). Magnification of various regions (denoted A-D) of the TEM image shown in Figure 5B. Serial sections are denoted as A1-A3, B1, B2, C1, C2, D1, and D2. Magnification of these images are labeled as “m.”

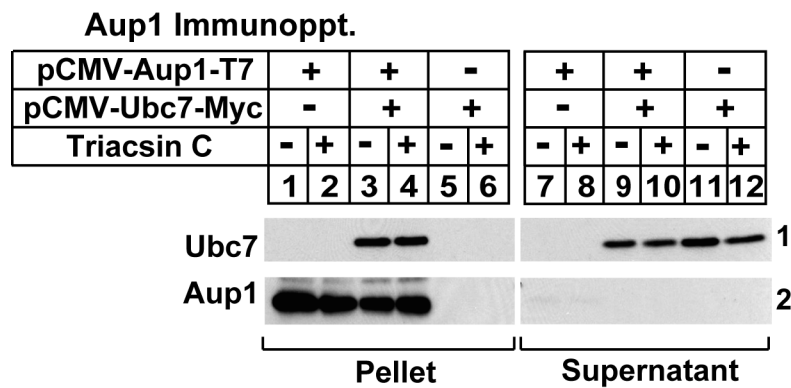

**Supplementary Figure 4.** The fatty acyl-CoA synthetase inhibitor Triacsin C does not inhibit Aup1-Ubc7 co-immunoprecipitation in transfected CHO cells. CHO-7 cells were set up for experiments on day 0, transfected on day 1 with 0.1  $\mu$ g/dish of pCMV-Aup1-T7 and 1  $\mu$ g/dish pCMV-Ubc7-Myc, and depleted of sterols as

described in the legend to Figure 1. The cells were then refeed medium A containing 5% LPDS and 10  $\mu$ M compactin in the absence or presence of 10  $\mu$ M Triacsin C. Following incubation for 4 hr at 37 °C, cells received 10  $\mu$ M MG-132 and incubated for an additional 2 hr, after which they were harvested for anti-T7 immunoprecipitation. Pellet and supernatant fractions were subjected to immunoblot analysis with anti-T7 (against Aup1) and IgG-9E10 (against Ubc7).
